# Supplementary material for: A high molecular weight reversible coordination polymer of PdCl2 and 1,12-bis(diphenylphosphino)dodecaneElectronic supplementary information (ESI) available: experimental details, SEC results and NMR spectra. See http://www.rsc.org/suppdata/cc/b3/b301874a/
Source: Royal Society of Chemistry journal article supplement (doi:10.1039/b301874a), 2003-01-01
Supplement: b301874a.doc [file b301874a.doc]

# Supplementary information belonging to “A high molecular weight reversible coordination polymer of PdCl2 and 1,12-bis(diphenylphosphino)dodecane”, by Jos M.J. Paulusse and Rint P. Sijbesma.

Experimental Section

**General Comments:** 1H-NMR, 13C-NMR and 31P-NMR spectra were recorded on a Bruker 400 MHz spectrometer. Chemical shifts are reported in ppm and referenced to tetramethylsilane and chloroform (proton and carbon) and external 85% phosphoric acid (phosphorus). Diffusion ordered 31P-NMR spectra were recorded on a Varian Inova 500 MHz spectrometer, with 85% phosphoric acid as an external reference. Diffusion measurements were evaluated with the Varian ® DOSY software incorporated in VNMR. Size Exclusion Chromatography (SEC) was performed on a Shimadzu LC10-AT, using Polymer Laboratories PL Gel 5 micrometer Mixed-D column, a Shimadzu SPD-10AV UV-Vis detector at 254 nm, and chloroform as eluent. Polystyrene standards were used for calibration.

Syntheses of the ligand and the complex were carried out under dry Argon atmosphere using standard Schlenk techniques. Tetrahydrofuran was distilled from sodium-potassium; dichloromethane and deutero-chloroform were distilled from P2O5. Acetonitril and n-hexane were degassed before use. Potassium diphenylphosphide (0.5M in THF) and 1,12-dibromododecane were purchased from Aldrich; palladium dichloride was purchased from STREM.

**Ph2P(CH2)12PPh2**, 1,12-bis(diphenylphosphino)dodecane

1,12-dibromododecane (3.28 g, 10.0 mmol) was dissolved in dry THF (50 mL) and the stirred solution was cooled to -78ºC with acetone/dry ice. A solution of potassium diphenylphosphide in THF (0.5 M, 40.0 mL, 20.0 mmol) was slowly added to the mixture. After complete addition, the mixture was stirred for an hour at -78ºC and left to warm up to room temperature. The mixture was stirred overnight. Solvent was removed *in vacuo* and the solids were suspended in dry dichloromethane (40 mL) and filtered over a glass filter. Solvent was removed *in vacuo*. Fine grey crystals were obtained in 88% yield by re-crystallization from boiling acetonitril.

H (400 MHz): 7.28-7.47 (m, 20H, Ph), 2.01 (t, 4H, C*H*2P), 1.18-1.47 (m, 20H, C*H*2) C (121 MHz): 139.44 (d, 4C, Ph) 133.05 (d, 8C, Ph), 128.76 (s, 8C, Ph), 128.70 (d, 4C, Ph), 31.57 (d, 2C, *C*H2P), 29.88 (d, 2C, alkyl), 29.60 (s, 4C, alkyl), 28.40 (d, 2C, alkyl), 26.32 (d, 2C, alkyl) P (162 MHz): -16.07 (s, 2P)

**Ph2P(CH2)11CH3**, 1-(diphenylphosphino)dodecane

1-bromododecane (1.87 g, 7.5 mmol) was dissolved in dry THF (50 mL) and the stirred solution was cooled to -78ºC with acetone/dry ice. A solution of potassium diphenylphosphide in THF (0.5 M, 15.0 mL, 7.5 mmol) was slowly added to the mixture. After complete addition, the mixture was stirred for an hour at -78ºC and left to warm up to room temperature. The mixture was stirred overnight. Solvent was removed *in vacuo* and the solids were suspended in dry dichloromethane (40 mL) and filtered over a glass filter. In order to remove residual impurities the mixture was filtered over silica, that was dried from water and air before use. Solvent was removed *in vacuo*. The product, a clear liquid was obtained in 78% yield. The liquid crystallizes when cooled to 5°C.

H (400 MHz): 7.35-7.49 (m, 10H, Ph), 2.08 (t, 4H, C*H*2P), 1.13-1.53 (m, 20H, C*H*2), 0.92 (t, 3H, C*H*3) C (121 MHz): 139.44 (d, 2C, Ph) 132.73 (d, 4C, Ph), 128.42 (s, 4C, Ph), 128.33 (d, 2C, Ph), 31.94 (s, 1C, alkyl), 31.24 (d, 1C, alkyl), 29.68 (s, 1C, alkyl), 29.64 (s, 1C, alkyl), 29.37 (m, 3C, alkyl) 29.28 (s, 1C, alkyl), 28.06 (d, 1C, alkyl), 26.05 (d, 1C, alkyl), 22.72 (s, 1C, alkyl), 14.15 (s, 1C, alkyl) P (162 MHz): -16.04 (s, 1P)

**[PdCl2{ Ph2P(CH2)12PPh2}]n**, Palladium dichloride(1,12-bis(diphenylphosphino)-dodecane

# Complexation

A mixture of palladium(II)dichloride (72.4 mg, 0.408 mmol, 1.1 equivalents) and 1,12-bis(diphenylphosphino)-dodecane (200.0 mg, 0.371 mmol) in dry dichloromethane (10 mL) was stirred for 24 hours. The mixture was filtered in order to remove the excess palladium(II)dichloride and solvent was removed *in vacuo*, yielding a bright yellow solid in 97% yield.

# Evaporation polymerisation

A solution of [PdCl2{Ph2P(CH2)12PPh2}]n (258 mg, 0.360 mmol) in dichloromethane (5 mL) was put in a small reaction tube. This tube was put in a larger Schlenk tube, which contained n-hexane (15 mL). Slow diffusion of the dichloromethane into the n-hexane resulted in the precipitation of an orange oil. The oil was removed and dried *in vacuo*, yielding a bright yellow solid.

*Melt polymerisation*

A Schlenk tube containing [PdCl2{Ph2P(CH2)12PPh2}]n (70 mg, 0.098 mmol) was heated under Argon to 185ºC for 15 minutes. The yellow solid became an orange oil, which upon cooling to room temperature became a brown brittle solid.

# Endcapping experiments

Melt polymerizations (see above) were performed on mixtures of [PdCl2{Ph2P(CH2)12PPh2}]n and 1-(diphenylphosphino)dodecane (1%, 5%, 10%, and 50%, respectively) containing a stoichiometric amount of PdCl2. The resulting polymers were analyzed with SEC immediately after dissolution in chloroform.

**Figure 1** SEC-traces of [PdCl2(dppdd)]n with different amounts of endcapper (1-(diphenylphosphino)dodecane)

**Table 1** SEC results of [PdCl2(dppdd)]n with different amounts of endcapper

| Percentage endcapper | Time of peak (min) | Mtop (g/mol)* | Mn (calc) |
| --- | --- | --- | --- |
| 0% | 6.30 | 71  103 |  |
| 1% | 6.68 | 35  103 | 144  103 |
| 5% | 6.92 | 23  103 | 29.3  103 |
| 10% | 7.23 | 13  103 | 15.0  103 |
| 50% | 8.01 | 2.0  103; 1.3  103 | 2.14  103 |

* Based on calibration with polystyrene standards.

**Figure 2** 31P-NMR Spectrum of diffusion polymerised [PdCl2(dppdd)]n in chloroform-d

**Figure 3** 31P-NMR Spectrum of melt polymerised [PdCl2(dppdd)]n in chloroform-d

**Figure 4** 1H-NMR Spectrum of melt polymerised [PdCl2(dppdd)]n in chloroform-d

**Figure 5** SEC-trace of evaporation-polymerized and melt polymerised [PdCl2(dppdd)]n
